# Supplementary material for: Automatic Cry Analysis: Deep Learning for Screening of Autism Spectrum Disorder in Early Childhood
Source: Springer Nature journal article supplement (doi:10.1007/s10803-025-06811-1), 2025-04-10
Supplement: MOESM1 [file 10803_2025_6811_MOESM1_ESM.docx]

**Supplementary Material**

***Automatic cry analysis: deep learning for screening of autism spectrum disorder in early childhood***

**Methods**

***Cry recordings and conditions***

Table 1S summarizes the original data from Khozaei et al., 2020, detailing cry recording conditions, the number of instances per infant per group, the types of devices used, recording locations, and the reasons for crying in each group.

| **Metric** | **ASD** | **TD** |
| --- | --- | --- |
| **Number of Instances per infant** | 6.1 ± 5.05 | 5.39 ± 3.66 |
| **Cry Duration (seconds)** | 5.27 ± 6 | 4.85 ± 3.93 |
| **Device** |  |  |
| **HQR** | 74.19% | 74.19% |
| **CP** | 25.81% | 25.81% |
| **Place** |  |  |
| **C2** | 58.06% | - |
| **C1** | 22.58% | - |
| **H** | 12.90% | 45.16% |
| **C3** | 3.23% | - |
| **C2/H** | 3.23% | - |
| **C5** | - | 35.48% |
| **C4** | - | 16.13% |
| **C6** | - | 3.23% |
| **Reason for crying** |  |  |
| **Unwilling/Complaining** | 38.71% | 25.81% |
| **Annoyed/Uncomfortable** | 19.35% | - |
| **Unwilling** | 9.68% | 16.13% |
| **Complaining** | 3.23% | 25.81% |
| **Sleepy** | 3.23% | 3.23% |
| **Separation from mother** | 3.23% | - |
| **Unwilling/Uncomfortable** | 3.23% | - |
| **Unwilling/Sleepy** | 3.23% | - |
| **Separation from mother/Hungriness** | 3.23% | - |
| **Annoyed** | 3.23% | - |
| **Annoyed/Complaining** | 3.23% | - |
| **Scared** | 3.23% | 9.68% |
| **Thirsty** | 3.23% | - |
| **Scared/Unwilling** | - | 19.35% |

***Table 1S.*** *Description of the audio recordings and conditions. Device: HQR (High quality voice recordings) and CP (smartphones). Place: H (homes); C1, C2, C3 (autism centers) and C4, C5, C6 (healthcare centers).*

***Jitter, Shimmer and HNR computation***

We extracted pitch-based features from the audio signal using Praat's (Boersma, 2002) "To Pitch (cc)" function, with parameters designed for high-resolution pitch detection. Features include pitch values (fundamental frequency) computed every 10 milliseconds with a frame length of 0.35 seconds. The total number of features depends on the audio duration and the frame rate, leading to approximately 100 frames per second. Additional settings include 15 harmonics for pitch detection, pitch thresholds (lower and upper) to filter out unreliable low and high-frequency components, and a voicing threshold of 0.14 to ensure reliable pitch estimation. We also define minimum and maximum pitch periods of 0.03 and 0.45 seconds, respectively, to capture valid pitch ranges, ensuring a robust set of features for the analysis.

More specifically, we extracted distinct families of audio features for each cry pattern using Praat software (Boersma, 2002). These encompass perturbation vocal metrics, which are widely extended in clinical contexts (Meghashree & Nataraja, 2019; Teixeira et al., 2013) including parameters such as jitter, shimmer, and HNR.

***Jitter*** measures the variability in pitch over time. We calculated jitter, which is the mean absolute difference between consecutive pitch periods with the following parameters: no pitch limits, period for calculation of 0.0001 to 0.02 s. A pitch floor of 1.3 was applied to remove low-frequency noise.

where:

- Ti is the fundamental frequency period (cycle duration) at frame i, extracted every 10 ms.
- N is the total number of frames within the analysis window.

***Shimmer*** measures the amplitude difference between successive pitch periods. To compute shimmer, we used the same first three parameters used for jitter and additionally, the amplitude ratio was set to 1.6. This allows for the measurement of shimmer across each audio frame.

where:

- Ai​ is the peak amplitude of the waveform in the i-th frame.
- N is the total number of frames.

The ***harmonics-to-noise ratio (HNR)*** quantifies the periodicity of the voice signal, where a higher value indicates a more periodic (voiced) signal, and a lower value indicates a noisier (aperiodic) signal. HNR was measured over the entire audio recording pattern to capture the overall balance between harmonic and noise components. It was computed using an autocorrelation-based method in Praat, where the signal is analyzed in short overlapping frames.

where:

- Ps​ is the power of the harmonic (periodic) components.
- Pn is the power of the noise (aperiodic) components.

***Additional Deep Learning Analysis***

In addition to R-CNN, we also assessed a pre-trained DenseNet201 and a CNN Malley architecture from scratch. These models are known for their efficient feature reuse and strong performance in image and acoustic classification tasks, offering a good balance of efficiency, generalization, and training stability for binary classification tasks. The details for each model are presented below:

***Custom pre-trained Densenet****:* The Custom pre-trained Densenet model is a modified version of DenseNet201, fine-tuned for specific project needs. It consists of a feature extraction branch based on a pre-trained DenseNet201 model from Torch Hub, where the original classifier is replaced with a custom fully connected classification head. The classifier comprises three linear layers with decreasing dimensions (1920 → 1000 → 100 → 1) defined after hyperparameter search, each followed by ReLU activations to introduce non-linearity. The model processes 128x128 spectrogram images using a binary classification approach. Training follows a 70%-30% split for training and validation, with a batch size of 16 and a maximum of 300 epochs. Optimization is handled using the Adam optimizer with Binary Cross Entropy with Logits (BCEWithLogits) loss function. To enhance generalization, data augmentation techniques such as time-frequency masking (20 time, 40 frequency), padding, cropping, and normalization are applied. A Cyclic Learning Rate (CyclicLR) scheduler is used, with a base learning rate of 1e-5 and a maximum learning rate of 1.08e-4. Early stopping is implemented with 100 epochs patience, monitoring validation loss to prevent overfitting.

***CNN Malley architecture****:* The CNN Malley model consists of a convolutional feature extraction block followed by a fully connected classification layer. The convolutional block includes four convolutional layers with increasing filter sizes (64, 128, 128, 256), using kernel sizes of (3,7), (7,1), and (8,1), with batch normalization and ReLU activation after each. Two MaxPooling layers ((2,1) and (4,1)) progressively reduce spatial dimensions. The extracted features are flattened and passed through a fully connected layer with 65,536 input features, a ReLU activation, and batch normalization, outputting a single prediction.

Additionally, Transformer-based models, especially Vision Transformers (ViT), have shown state-of-the-art performance in many sequence modeling tasks due to their attention mechanisms. Thus, we performed additional analysis using transfer learning with the ViT model ("google/vit-base-patch16-224") from the Hugging Face Transformers library. We reconfigured it for binary image classification, freezing most layers and fine-tuning the classifier head and the final transformer block. Data augmentation (random horizontal flipping, rotation, and zoom) was also applied to enhance generalization. More technical details are provided below for reproducibility:

***ViT Image Classification Model:*** The ViT-based model is a ViT architecture fine-tuned for a binary image classification task using the ViT-Base-Patch16-224 model from Google. It processes 224x224 images with 3 color channels, leveraging a patch-based approach (16x16 patch size), where each patch is encoded into a 768-dimensional hidden representation. The model consists of 12 Transformer encoder layers, each with 12 attention heads, using GELU activations, layer normalization (ε = 1e-12), and dropout to enhance stability. The model is pre-trained using AdamW with PyTorch backend, a learning rate of 5e-5, and a linear learning rate scheduler. A batch size of 8 is used, with gradient accumulation of 1, 0.1 warmup ratio, and weight decay of 0.0. Training spans 100 epochs, with early stopping patience of 5 epochs and a threshold of 0.01 to prevent overfitting. The classifier head maps extracted representations to two output labels (0 and 1) through a fully connected layer, following a single-label classification approach.

While Transformer-based models like ViT have shown promise in many tasks, they underperformed in this study due to overfitting related to the challenge of fine-tuning for a limited and specialized dataset (lacking pre-training on similar data). Similarly, DenseNet and CNN Malley, though strong in feature extraction, struggled to capture the temporal dependencies crucial for distinguishing cry patterns, leading to lower performance. In contrast, the R-CNN model outperformed the others, as it was able to effectively capture both spatial and temporal features, critical for this sequential task. Additionally, R-CNN’s ability to be trained from scratch allowed for better adaptation to the unique characteristics of the cry data, making it the most suitable and efficient model for this specific classification task on a reduced dataset. Therefore, despite being a less novel method compared to Transformers, R-CNN demonstrated superior performance and practicality for this specific application.

The results of these additional experiments are presented in Table 2S. Most of the tested models performed well under the same conditions and dataset. However, the R-CNN approach demonstrated superior performance:

| Model | Accuracy (%) | Recall (%) | Precision (%) | F1-score (%) |
| --- | --- | --- | --- | --- |
| R-CNN | 90.28 | 88.64 | 95.12 | 91.76 |
| DenseNet201 | 82.41 | 85.48 | 84.13 | 84.80 |
| CNN - Malley | 75.93 | 79.03 | 79.03 | 79.03 |
| Vision Transformer | 81.94 | 89.47 | 79.06 | 83.95 |

***Table 2S.*** *Additional Deep Learning Models Analysis*

**References**

Boersma, P. (2002). Praat, a system for doing phonetics by computer. *Glot International*, *5*.

Khozaei, A., Moradi, H., Hosseini, R., Pouretemad, H., & Eskandari, B. (2020). Early screening of autism spectrum disorder using cry features. *PLoS ONE*, *15*(12), e0241690. https://doi.org/10.1371/journal.pone.0241690

Meghashree, & Nataraja, D. N. P. (2019). Acoustic Features of Cry of Infants with High Risk Factors. *International Journal of Health Sciences and Research*, *9*(12), 62–67.

Teixeira, J. P., Oliveira, C., & Lopes, C. (2013). Vocal Acoustic Analysis – Jitter, Shimmer and HNR Parameters. *Procedia Technology*, *9*, 1112–1122. https://doi.org/10.1016/j.protcy.2013.12.124
